# Supplementary material for: Dietary Choline Mitigates High-Fat Diet-Impaired Chylomicrons Assembly via UPRer Modulated by perk DNA Methylation
Source: MDPI journal article supplement (doi:10.3390/cells11233848), 2022-11-30
Supplement: s1 [file s1]

**Table S1. Feed formulation and proximate analysis of experimental diets.**

| Ingredients (g kg <sup>-1</sup> )                                   | Control | HFD   | CH     | HFD + CH |
|---------------------------------------------------------------------|---------|-------|--------|----------|
| Casein                                                              | 360     | 360   | 360    | 360      |
| Gelatin                                                             | 80      | 80    | 80     | 80       |
| Fish oil                                                            | 30      | 45    | 30     | 45       |
| Corn oil                                                            | 30      | 45    | 30     | 45       |
| Wheat flour                                                         | 250     | 250   | 250    | 250      |
| Ascorbyl-2-polyphosphate                                            | 10      | 10    | 10     | 10       |
| NaCl                                                                | 10      | 10    | 10     | 10       |
| Ca (H <sub>2</sub> PO <sub>4</sub> ) <sub>2</sub> ·H <sub>2</sub> O | 10      | 10    | 10     | 10       |
| Vitamin premix <sup>1</sup>                                         | 5       | 5     | 5      | 5        |
| Mineral premix <sup>2</sup>                                         | 5       | 5     | 5      | 5        |
| Cellulose                                                           | 209.5   | 179.5 | 208.5  | 179.5    |
| Choline chloride                                                    | 0.5     | 0.5   | 1.5    | 1.5      |
| <i>Proximate analysis (% dry weight)</i>                            |         |       |        |          |
| Moisture                                                            | 7.22    | 7.38  | 7.29   | 7.34     |
| Crude protein                                                       | 39.99   | 40.86 | 40.54  | 40.23    |
| Crude ash                                                           | 5.37    | 5.29  | 5.36   | 5.38     |
| Crude lipid                                                         | 10.15   | 14.61 | 10.49  | 14.65    |
| Choline (mg kg <sup>-1</sup> )                                      | 563.4   | 578.9 | 1650.1 | 1652.3   |

<sup>1</sup>Vitamin premix (mg or IU per kg diet): retinylacetate, 10000IU; cholecalciferol, 1000IU; all-rac- $\alpha$ -tocopheryl acetate, 30IU; menadione nicotinamide bisulfite, 7; thiamine hydrochloride, 6; riboflavin, 3; pyridoxine hydrochloride, 12; D-calcium pantothenate, 30; niacin, 50; biotin, 1; folic acid, 6; cyanocobalamin, 0.03.

<sup>2</sup>Mineral mixture (mg per kg diet): Ca(H<sub>2</sub>PO<sub>3</sub>)<sub>2</sub>·H<sub>2</sub>O, 1000; FeSO<sub>4</sub>·7H<sub>2</sub>O, 40; ZnSO<sub>4</sub>·7H<sub>2</sub>O, 40; MnSO<sub>4</sub>·H<sub>2</sub>O, 40; CuSO<sub>4</sub>·5H<sub>2</sub>O, 2; CaIO<sub>3</sub>·6H<sub>2</sub>O, 3; Na<sub>2</sub>SeO<sub>3</sub>, 0.05; CoSO<sub>4</sub>, 0.05.

**Table S2. Effects of dietary high fat and choline supplementation on growth performance and morphological parameters yellow catfish (*Pelteobagrus fulvidraco*) after 10 weeks.**

| Diet                      | Control                   | HFD                       | CH                       | HFD+CH                   | Two-way ANOVA <i>P</i> -value |         |             |
|---------------------------|---------------------------|---------------------------|--------------------------|--------------------------|-------------------------------|---------|-------------|
|                           |                           |                           |                          |                          | Fat                           | Choline | Interaction |
| IBW, g/fish               | 3.78±0.05                 | 3.78±0.03                 | 3.80±0.06                | 3.85±0.01                | NS                            | NS      | NS          |
| FBW, g/fish               | 31.38±0.91 <sup>ab</sup>  | 35.10±0.14 <sup>c</sup>   | 30.03±0.63 <sup>a</sup>  | 32.00±0.50 <sup>b</sup>  | <0.001                        | <0.001  | 0.034       |
| WG <sup>2</sup> , %       | 728.60±0.15 <sup>ab</sup> | 827.08±0.061 <sup>c</sup> | 690.16±0.10 <sup>a</sup> | 730.60±0.16 <sup>b</sup> | <0.001                        | <0.001  | 0.049       |
| FCR <sup>3</sup>          | 1.15±0.03                 | 1.08±0.03                 | 1.17±0.02                | 1.14±0.01                | 0.025                         | NS      | NS          |
| HSI <sup>4</sup> , %      | 1.37±0.27                 | 1.43±0.17                 | 1.30±0.25                | 1.40±0.20                | NS                            | 0.007   | NS          |
| CF <sup>5</sup> , %       | 1.70±0.06                 | 1.68±0.30                 | 1.69±0.34                | 1.72±0.15                | NS                            | NS      | NS          |
| Survival <sup>6</sup> , % | 98.66±2.30                | 98.66±2.30                | 96.00±4.00               | 97.33±3.21               | NS                            | NS      | NS          |

<sup>1</sup>Values are means ± SEM; n = 3 tanks (30 fish/tank). Labeled means without a common letter differ, *P* < 0.05 (TWO-factor ANOVA, Duncan's post hoc test).

<sup>2</sup>WG = (FBW-IBW)/IBW×100.

<sup>3</sup>FCR = dry feed fed (g)/wet weight gain (g).

<sup>4</sup>HSI = 100×(liver weight)/(body weight);

<sup>5</sup>CF = 100×(live weight, g)/(body length, cm)<sup>3</sup>.

<sup>6</sup>Survival = 100 ×final fish number/initial fish number.

**Table S3. Primers used for plasmid construction and RT-qPCR analysis**

| Gene                                                   | Accession No.     | Forward primer (5'-3')                         | Reverse primer (5'-3')                          |
|--------------------------------------------------------|-------------------|------------------------------------------------|-------------------------------------------------|
| <b>Bisulfite sequencing for methylation validation</b> |                   |                                                |                                                 |
| <i>perk</i>                                            | KP687344.1        | TTTAGGGTTGGGTTATTTA<br>GAAATG                  | ATCTTCTCTCTCATATCAA<br>TCTCATATACA              |
| <b>Plasmid construction</b>                            |                   |                                                |                                                 |
| <i>perk</i>                                            | KP687344.1        | ctagcgtttaacttaagcttATGGAG<br>CAAGCAAACCTCTACG | aacggggccctctagactcgagTTAG<br>GCACAGTTACCCATGGC |
| <b>RT-qPCR analysis</b>                                |                   |                                                |                                                 |
| <i>18s</i>                                             | EU047719          | GGCGCGCAAATTACCCAT<br>T                        | TCCCGAGATCCAACTACA<br>AGC                       |
| <i>β-actin</i>                                         | DQ211096.1        | ACCCTGAAGTACCCCATC<br>GA                       | CAGAGGCATACAGGGAC<br>AGC                        |
| <i>acca</i>                                            | GU908474.1        | GCTTGCGGCGGTTATTAC<br>TG                       | AGCTGCCTCTCCAACCAT<br>TC                        |
| <i>b2m</i>                                             | AB128864.1        | GCACTCGTCTCTTTTGCC<br>CT                       | TTTCGAAGGCCAGGTCAG<br>TC                        |
| <i>dnmt1</i>                                           | MN701649          | TCATGTGCGGGAACAACA<br>AC                       | TGCAGCACATGTAGCAGT<br>TC                        |
| <i>dnmt3a</i>                                          | MN701650          | TGCAGCACTTCTTTGCCA<br>AC                       | GACAGGACACGAATGGG<br>TTTTC                      |
| <i>dnmt3b</i>                                          | MN701651          | ACCTGGAATGAACCGACC<br>AC                       | ATTCATGGTGACCGGCAG<br>AG                        |
| <i>fas</i>                                             | GU433188          | TCATCCAGCAGTTCCTG<br>GCATT                     | TGATTAGGTCCACGGCCA<br>CA                        |
| <i>6pgd</i>                                            | XM0034449<br>04.4 | GAAGGGCCTGCTGTTTGT<br>TG                       | CCCAGTCACAACAAGGC<br>TCT                        |
| <i>g6pd</i>                                            | XM0054781<br>06   | GAGAAGCCCTTTGGTCGT<br>GA                       | ATCAAAGTACCCTCCACG<br>GC                        |
| <i>dgat1</i>                                           | MN701645          | AACGAAAGACTGCGCAA<br>GAG                       | ACCCATGGCTTTGACAAA<br>CG                        |
| <i>dgat2</i>                                           | MN701646          | TTCCGGGAACCTTTGACAT<br>GC                      | GGTTGCGCATTTTGGCTT<br>TG                        |
| <i>mgat1</i>                                           | GQ266394.1        | CCACCGGCCATCTGATCT<br>AC                       | GTGTCCAGGGGCATCAAT<br>GA                        |
| <i>mgat2</i>                                           | MG241310.1        | TTGTGGTCTTCTCCTCGG<br>TC                       | ACGACACCCACATCTCCA<br>AT                        |
| <i>grp78</i>                                           | FJ436356.1        | ATTTGTTCCGCTCCACCAT<br>G                       | AACTCTTTCACCAGCTGC<br>TG                        |
| <i>perk</i>                                            | KP687344.1        | GGGAAACTGTGGAGGGA<br>TGG                       | TGCAGCCTTGACCACTTT<br>CT                        |

|                           |                   |                           |                           |
|---------------------------|-------------------|---------------------------|---------------------------|
| <i>elf2a</i>              | JN195739.1        | TCGGCCCCAGTCTCATTC<br>TA  | ATACACCACTCGCCTCTC<br>CT  |
| <i>ire1a</i>              | KY081668.1        | TTCTGCGGGAAACGTTTC<br>AC  | ACTACGCATGAACCGTTT<br>GG  |
| <i>xbp1</i>               | MN701647          | CTCCTGAACAGAAGCAG<br>CCA  | CTCGAAGTGCTCTGCCAT<br>GA  |
| <i>atf6</i>               | XM0054713<br>82   | TCCCCGGATCATCGTATG<br>GA  | TCCTGCAGTGACTCCTAA<br>CG  |
| <i>apob</i>               | KF871430          | TCCCCGGATCATCGTATG<br>GA  | TCCTGCAGTGACTCCTAA<br>CG  |
| <i>apobec1</i>            | XM0034479<br>23.5 | GATCCTCACTACTGCCAG<br>CC  | CCTTCGACGATGAGAGAG<br>CC  |
| <i>apoe</i>               | XM0034502<br>74.5 | GACCAGTTCTGGGCCATG<br>AA  | GGTGTATGCGTTGCCTAC<br>AG  |
| <i>mtp</i>                | XM0259072<br>53.1 | GATGTTGTGGCACCAGGA<br>GA  | CATTCTGTCATCGCTGCT<br>GC  |
| <i>sar1b</i>              | XM0054764<br>33.4 | TACTGGTTCACGTGCCTG<br>AG  | GCTCGATTGGCAAACAGG<br>AC  |
| <i>cd36</i>               | XM0193567<br>96.2 | GTCCAGCAGATCCGTGAG<br>C   | TGCCAGGAACTTGGTCTT<br>GTC |
| <i>vamp7</i>              | XM0034394<br>38.5 | GCCTCCAGCTAAACTCCA<br>ACC | CGCTCTCGCTCGTACACC<br>TC  |
| <b>siRNA sequences</b>    |                   |                           |                           |
| siRNA-<br><i>perk-376</i> |                   | GCGAGCACCGUGCAGUU<br>UATT | UAAACUGCACGGUGCUC<br>GCTT |
| NC-<br>siRNA              |                   | UUCUCCGAACGUGUCACGU<br>TT | ACGUGACACGUUCGGAGAA<br>TT |

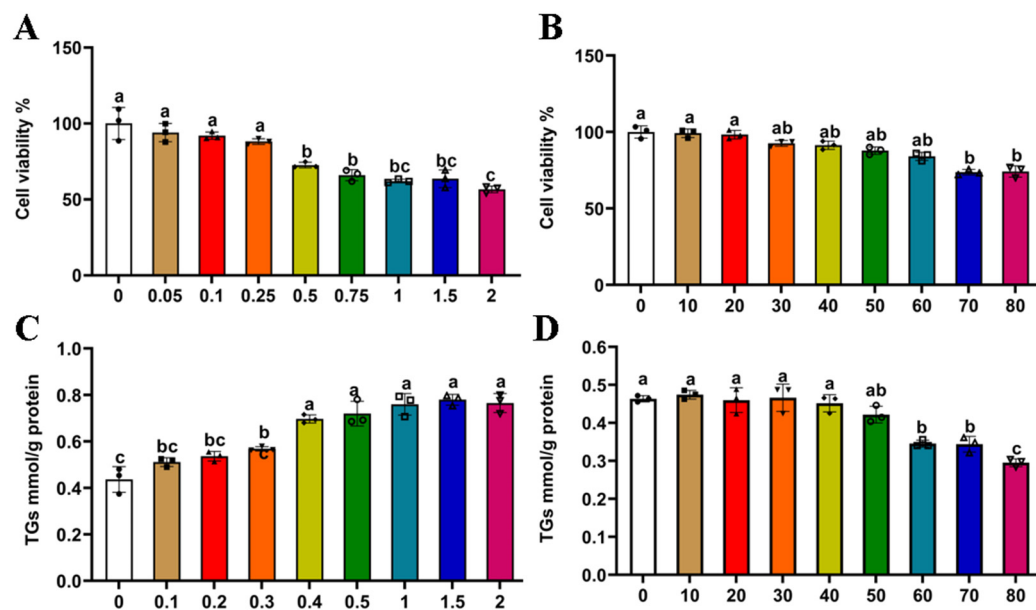

**Figure S1. MTT assay and TGs content for the viability of intestinal epithelial cells (IECs) of yellow catfish incubated with FA and choline for 36h. (A-B) MTT assay of FA and choline. (C-D) TG content of FA and choline. Values are means  $\pm$  SEM,  $n \geq 3$ . Letters denote significance at  $P < 0.05$  (One-way ANOVA, Duncan post hoc test).**

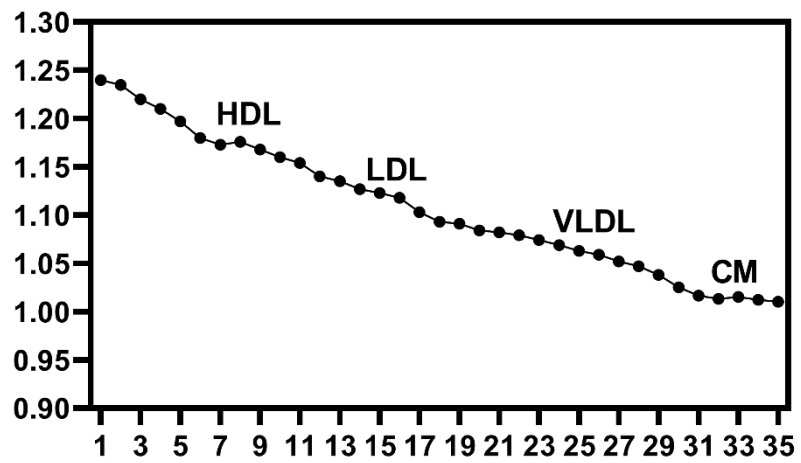

Figure S2. The fraction of density gradient separation for lipoprotein.

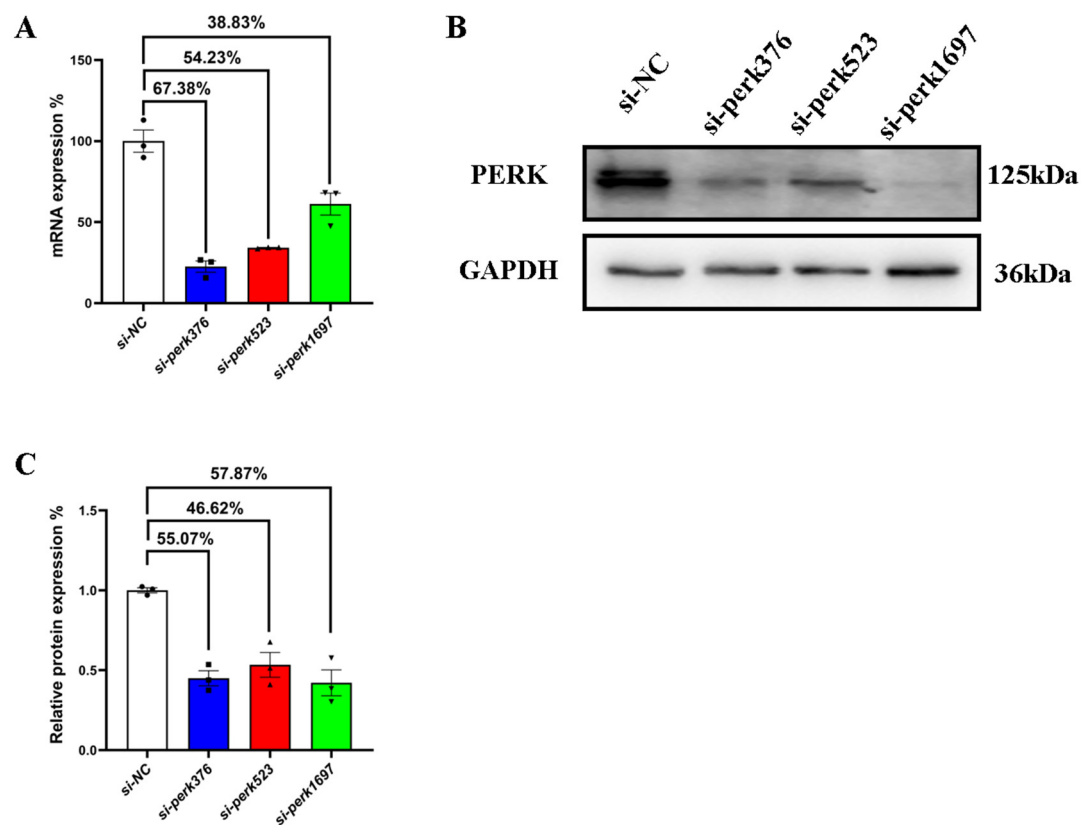

**Figure S3. The knockdown efficiency of *perk* gene in IECs.** (A) mRNA levels of *perk*. (B-C) Western blot analysis for PERK. Values are means  $\pm$  SEM,  $n \geq 3$ . Letters denote significance at  $P < 0.05$  (One-way ANOVA, Duncan post hoc test).

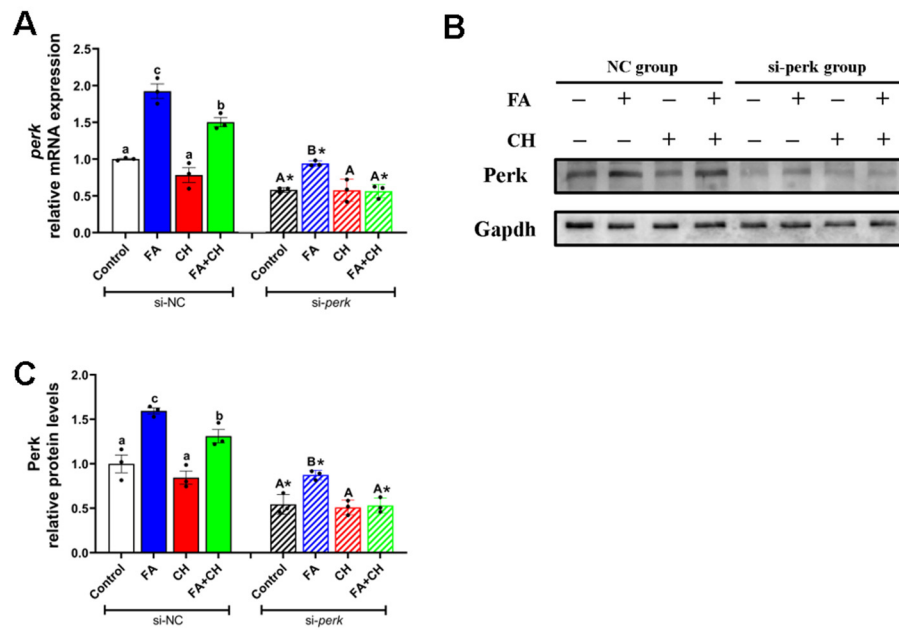

**Figure S4. mRNA levels and Western blot analysis of *perk* in the IECs under FA and CH incubation and transfected with si-*perk*.** (A) mRNA levels of *perk*. (B-C) Western blot analysis for Perk. Data are mean  $\pm$  SEM,  $n = 3$   $n = 3$  independent biological experiments; different minuscules indicate significant differences in si-NC groups, different majuscules indicate significant differences in si-*perk* groups ( $p \leq 0.05$ ); asterisks indicate significant differences between si-NC and si-*perk* groups ( $*p \leq 0.05$ ).



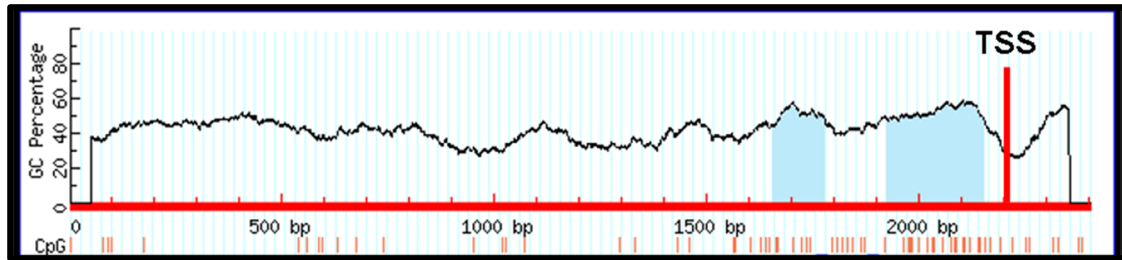

Figure S5. Prediction analysis of CpG islands in the sequence range of 2300 bp upstream from the transcriptional start site in the *perk* promoter region (<http://www.urogene.org/>). TSS, transcription start site.

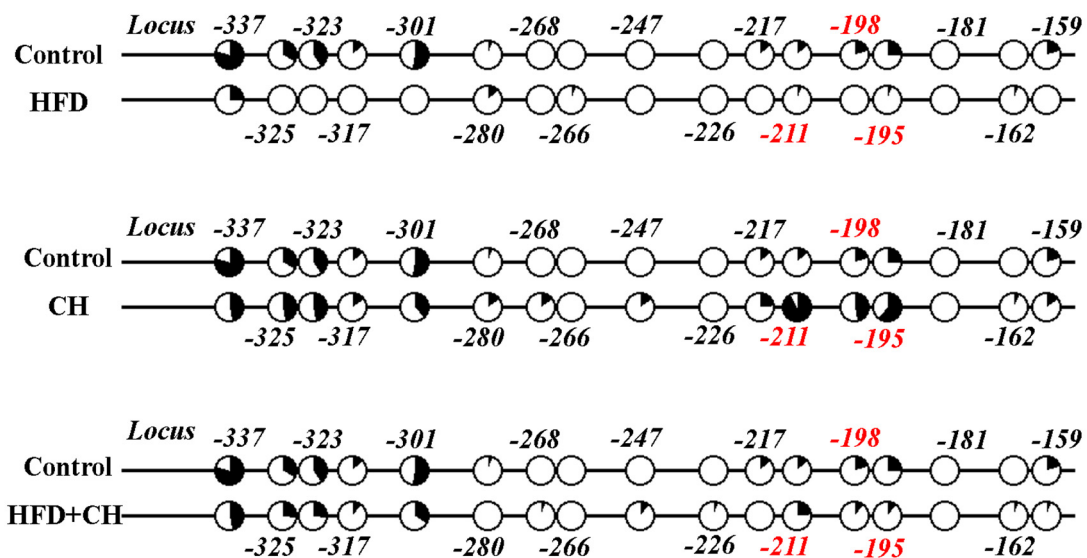

Figure S6. Bisulfite sequencing of the promoters of *perk* between the control, HFD, CH and HFD + CH.

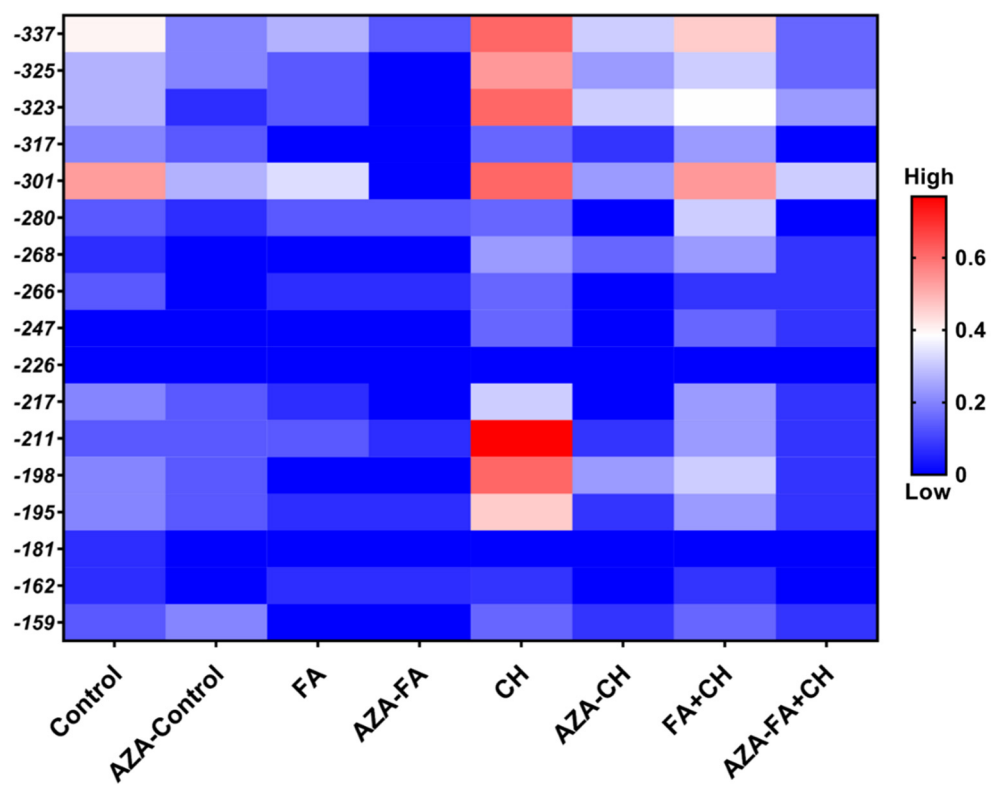

Figure S7. Heat map of methylation percentage of *perk* in the IECs under FA and CH incubation and addition AZA.

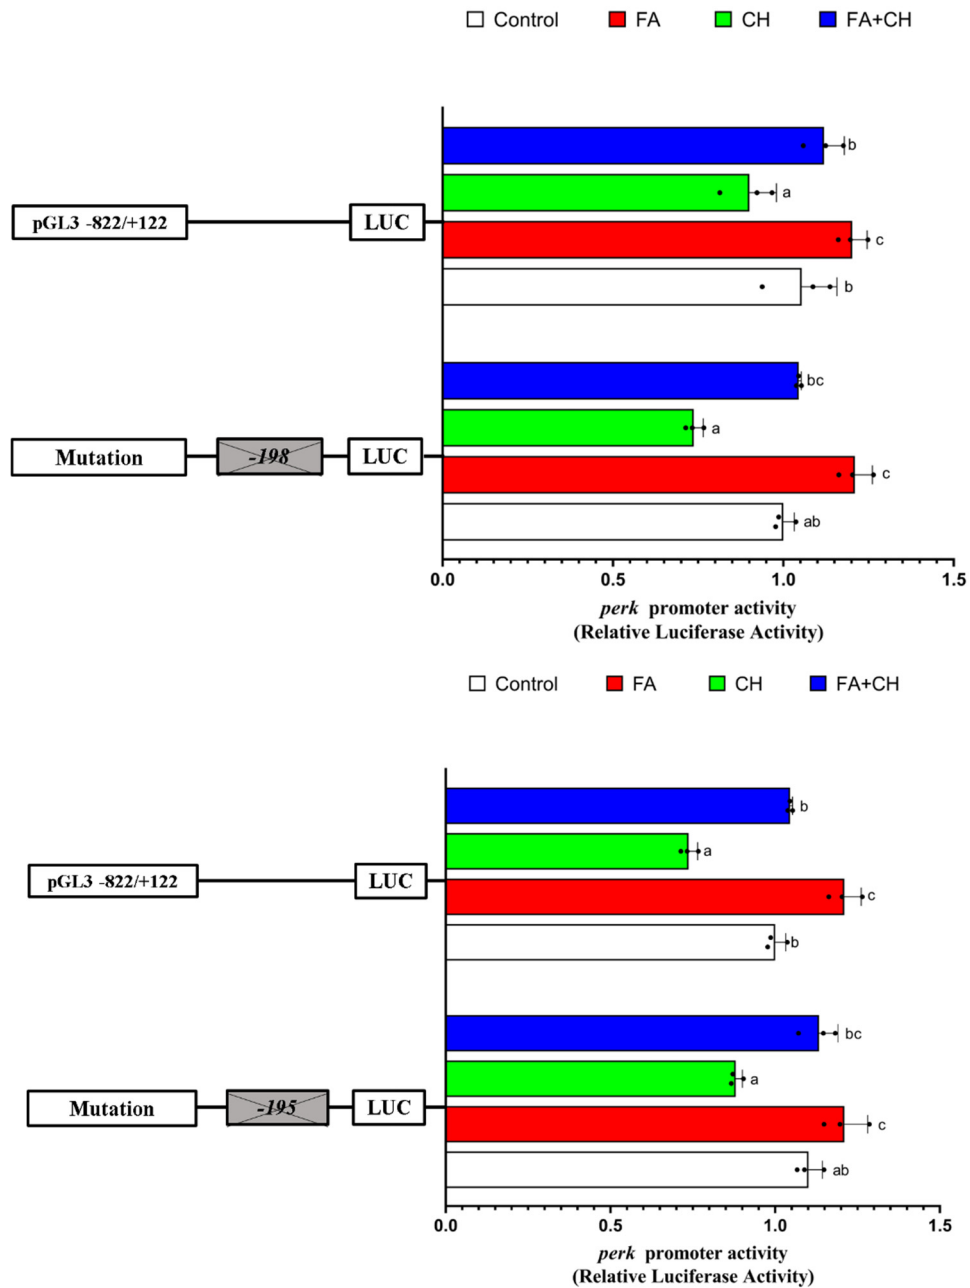

**Figure S8. The -198 and -195 methylation sites relative luciferase activities of *perk* in the IECs under FA and CH incubation.** Values are means  $\pm$  SEM,  $n \geq 3$ . Letters denote significance at  $P < 0.05$  (One-way ANOVA, Duncan post hoc test).
